# Supplementary material for: A self-powered droplet sensor based on a triboelectric nanogenerator toward the concentration of green tea polyphenols
Source: Royal Society of Chemistry journal article supplement (doi:10.1039/d4nr01799d), 2024-01-01
Supplement: d4nr01799d1.pdf [file d4nr01799d1.pdf]

*Supporting information for*

**Self-Powered Droplet Sensor Based on Triboelectric Nanogenerator  
toward concentration of green tea polyphenols**

**Guochen Lin<sup>1,2</sup>, Chang Su<sup>1,2</sup>, Chengmin Bao<sup>1,2</sup>, Maoyi Zhang<sup>1</sup>, Chuanbo Li<sup>2,\*</sup>,  
and Ya Yang<sup>1,3,\*</sup>**

*<sup>1</sup> Beijing Key Laboratory of Micro-Nano Energy and Sensor, Center for High-Entropy Energy and Systems, Beijing Institute of Nanoenergy and Nanosystems, Chinese Academy of Sciences, Beijing 101400, P. R. China*

*<sup>2</sup> College of Life and Environmental Science, Minzu University of China, Beijing 100081, P. R. China*

*<sup>3</sup> School of Nanoscience and Technology, University of Chinese Academy of Sciences, Beijing 100049, P. R. China*

\*E-mail: [yayang@binn.cas.cn](mailto:yayang@binn.cas.cn)

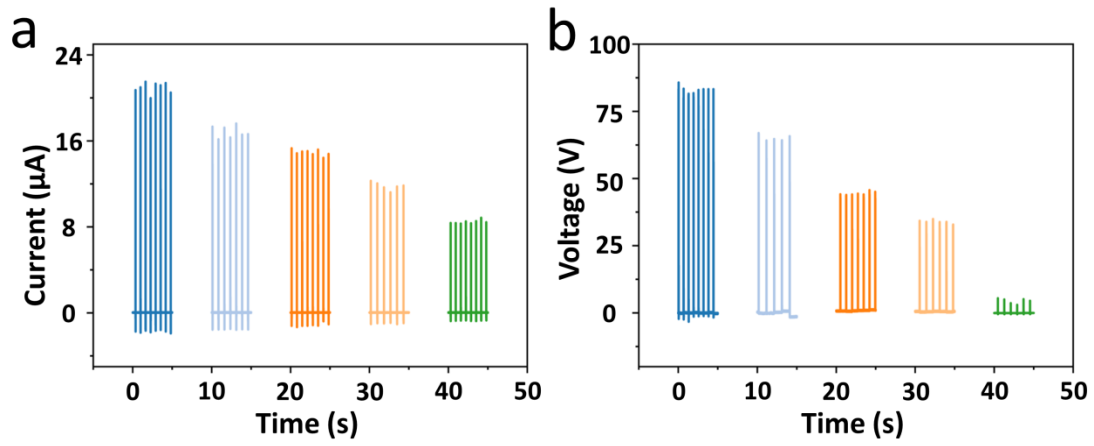

**Supplementary Figure 1.** **a**, The short-circuit current of NaCl solution.(0, 0.5 mM, 1.0 mM, 1.5 mM, 2.0 mM) **b**, The open-circuit voltage of NaCl solution.(0, 0.5 mM, 1.0 mM, 1.5 mM, 2.0 mM)

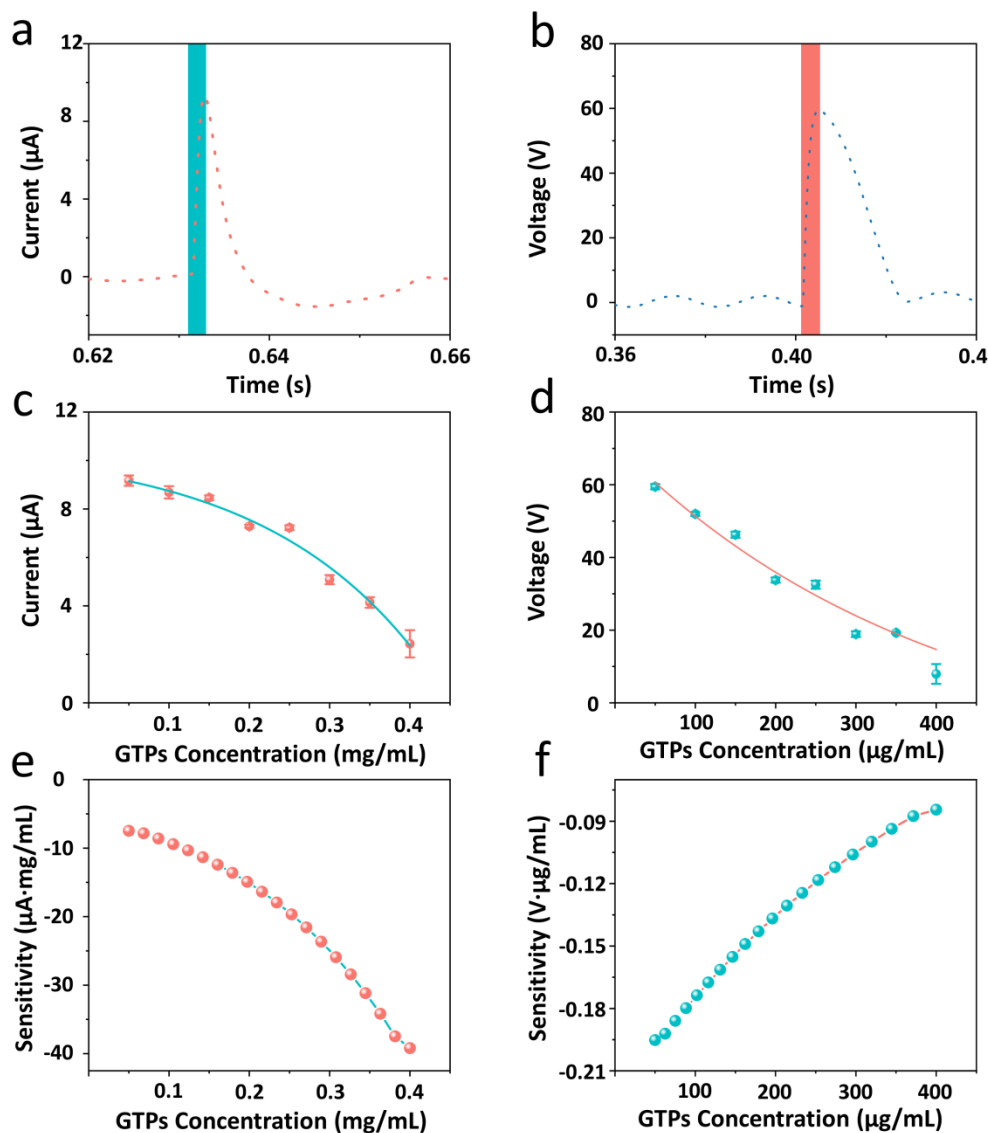

**Supplementary Figure 2.** **a**, Short-circuit current response time of the sensor at the concentration of GTPs solution is 0.05 mg/mL. **b**, Open-circuit voltage response time of the sensor at the concentration of GTPs solution is 0.05 mg/mL. **c**, Fitting curves of short-circuit currents of tea polyphenol solutions with different concentrations (from 0.05 to 0.4 mg/mL). **d**, Fitting curve of open circuit voltage of tea polyphenol solution with different concentration (from 0.05 to 0.4 mg/mL). **e**, Short-circuit current sensitivity of the sensor with the concentration of tea polyphenol solution from 0.05 to 0.4 mg/mL. **f**, Open-circuit voltage sensitivity of the sensor with the concentration of tea polyphenol solution from 0.05 to 0.4 mg/mL.

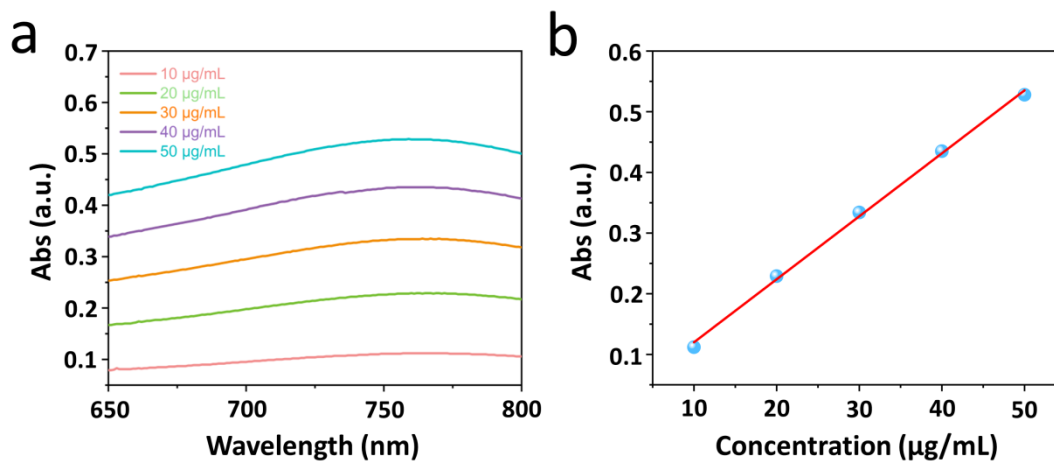

**Supplementary Figure 3. a**, Absorption spectra of gallic acid standard solution with different concentrations. **b**, Standard curve of gallic acid standard solution

The absorption peak of gallic acid working solution is at 765nm. The figure S3 a showed the absorption spectra of gallic acid working fluids at different concentrations (10, 20, 30, 40 and 50 µg/mL). Then a scatter plot is made based on the concentration and the absorption rate at 765nm of gallic acid working solution. Figure S3 b showed the standard curve of gallic acid working fluid obtained by linear fitting of the scatter plot, and the slope of the curve was 0.01038.

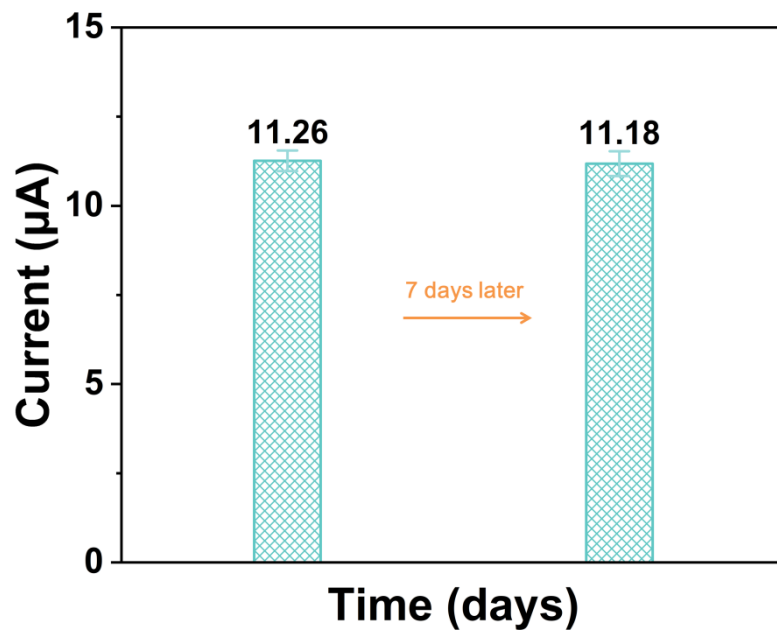

**Supplementary Figure 4.** The average short-circuit current of Longjing green tea water diluted 20 times after seven days by the same LS-TENG.

The figure S4 showed the average short-circuit current of Longjing green tea water diluted 20 times after seven days by the same LS-TENG. The average short-circuit current decreased from  $11.26 \pm 0.29 \mu\text{A}$  to  $11.18 \pm 0.35 \mu\text{A}$ , indicated that the device has good stability within 7 days.
